# Supplementary material for: GATR-3, a Peptide That Eradicates Preformed Biofilms of Multidrug-Resistant Acinetobacter baumannii
Source: MDPI journal article supplement (doi:10.3390/antibiotics13010039), 2023-12-31

**Supplementary Materials:****Table S1.** List of MDR ESKAPE pathogens tested.

| <b>Strain</b>                              | <b>Source</b> | <b>Source information</b>   | <b>MDR</b> |
|--------------------------------------------|---------------|-----------------------------|------------|
| <i>Enterococcus (E.) faecalis</i> 51299    | ATCC          | Human peritoneal fluid      | VRE        |
| <i>S. aureus</i> 33592                     | ATCC          | Human blood                 | MRSA       |
| <i>K. pneumoniae</i> BAA-1705              | ATCC          | Human urine                 | KPC        |
| <i>P. aeruginosa</i> BAA-2110              | ATCC          | Human sputum                | Yes        |
| <i>Enterobacter (E.) asburiae</i> BAA-3043 | ATCC          | Human wound                 | Yes        |
| <i>A. baumannii</i> AB5075 (MRSN 959)      | BEI Resources | Human tibia/osteomyelitis   | Yes        |
| <i>A. baumannii</i> BAA-1710               | ATCC          | Human blood                 | Yes        |
| <i>A. baumannii</i> BAA-1794               | ATCC          | Human sputum                | Yes        |
| <i>A. baumannii</i> BAA-1795               | ATCC          | Human nasotracheal aspirate | Yes        |
| <i>A. baumannii</i> BAA-1797               | ATCC          | Human blood                 | Yes        |
| <i>A. baumannii</i> BAA-1799               | ATCC          | Human blood                 | Yes        |
| <i>A. baumannii</i> BAA-1605               | ATCC          | Human sputum                | Yes        |
| <i>A. baumannii</i> BAA-1800               | ATCC          | Human deep trachea          | Yes        |

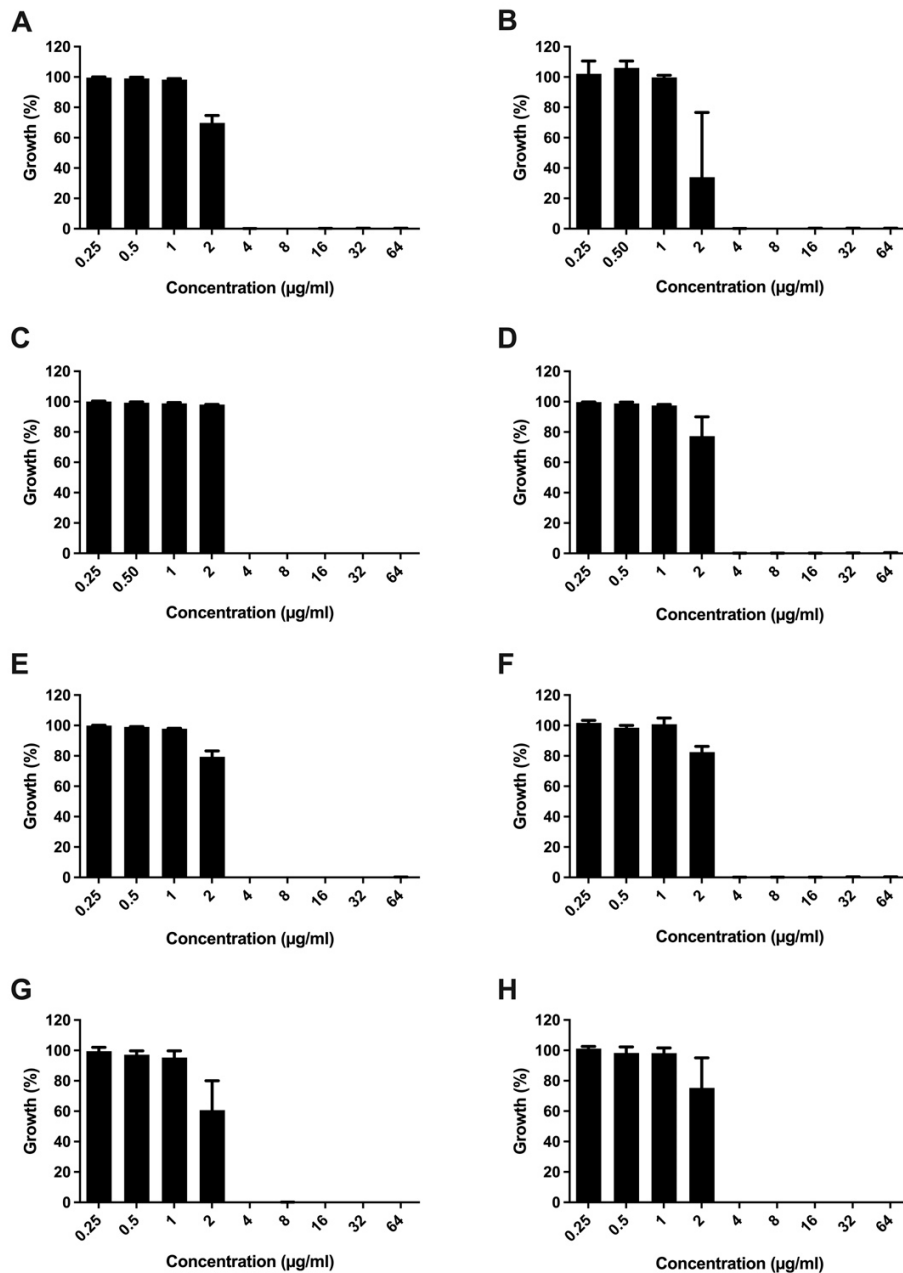

**Figure S1.** Minimum inhibitory concentration (MIC) of GATR-3 against *A. baumannii*: (A) AB5075, (B) BAA-1710, (C) BAA-1794, (D) BAA-1795, (E) BAA-1797, (F) BAA-1799, (G) BAA-1605 and (H) BAA-1800. Growth was measured spectrophotometrically (OD<sub>600</sub>) after 20 – 24 h incubation. The percentage of growth was calculated relative to the untreated bacteria control (100%).

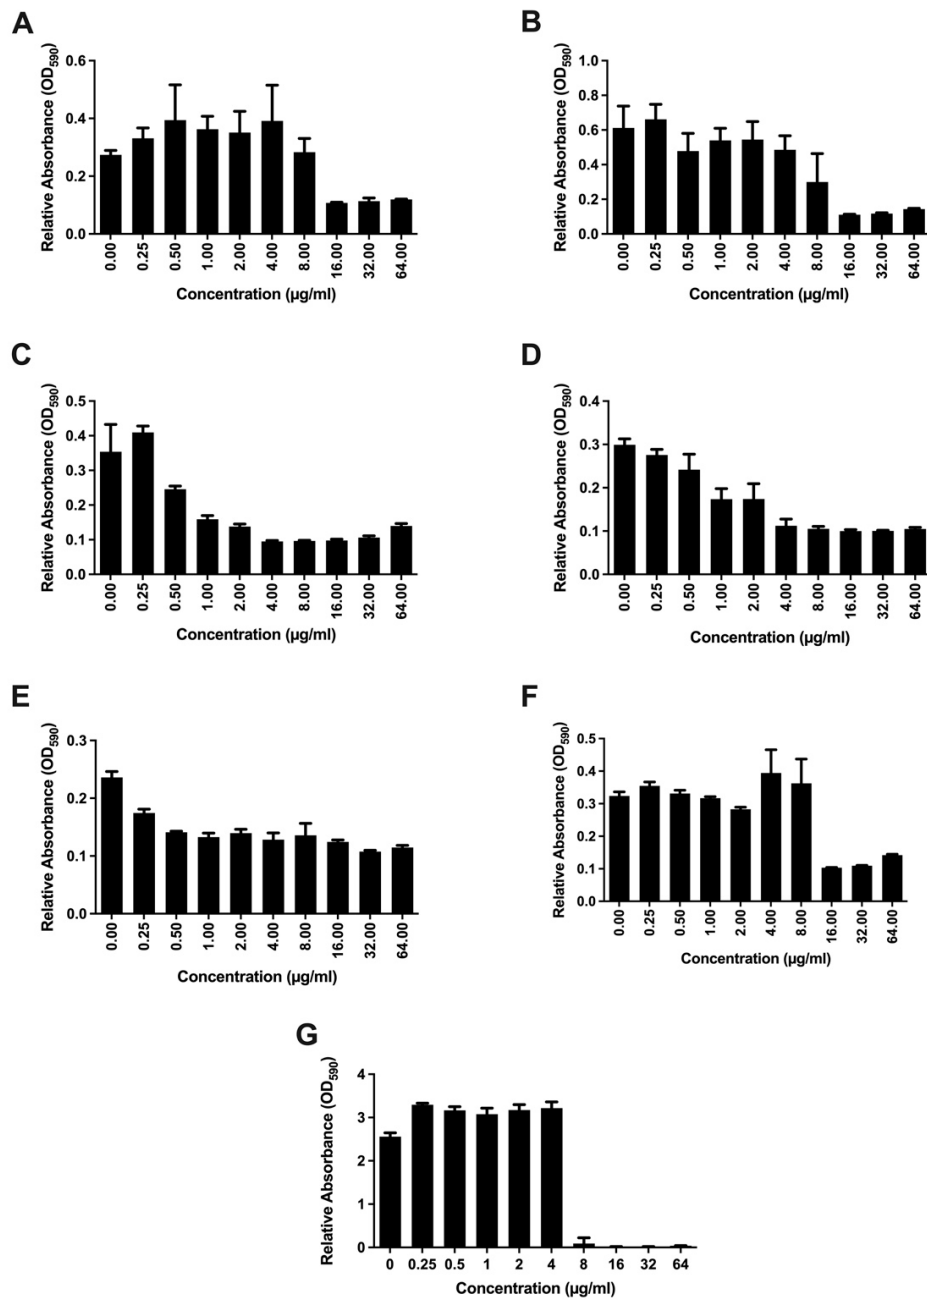

**Figure S2.** Minimum biofilm inhibitory concentration (MBIC) of GATR-3 against *A. baumannii*: (A) AB5075, (B) BAA-1710, (C) BAA-1794, (D) BAA-1795, (E) BAA-1797, (F) BAA-1605 and (G) BAA-1800. Crystal violet stain was read via OD<sub>590</sub>.

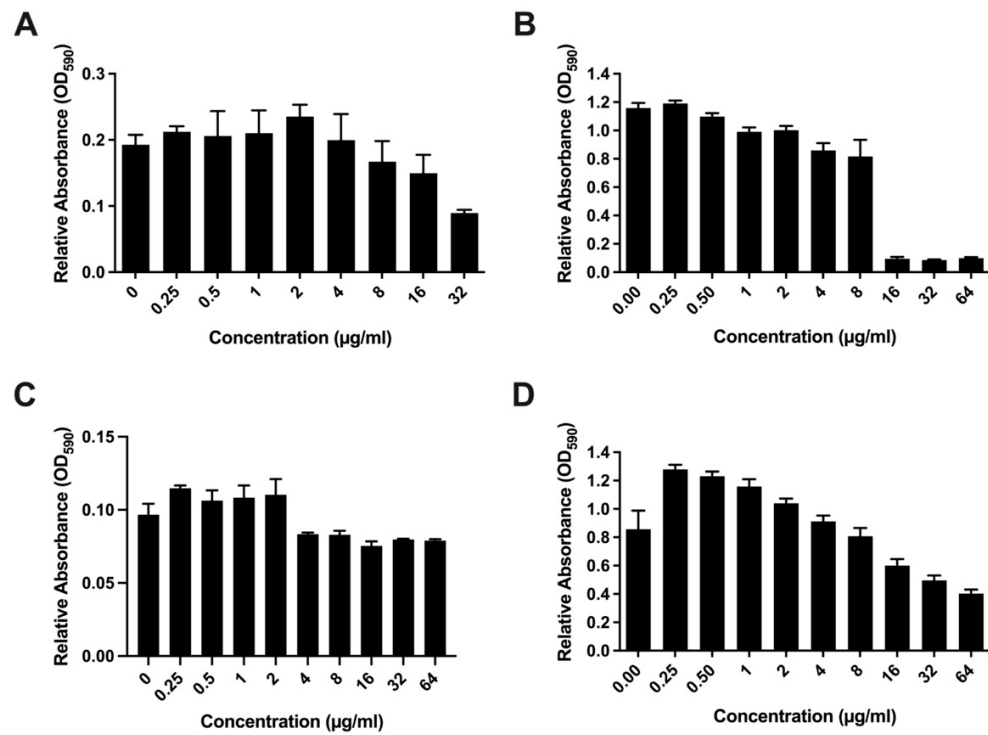

**Figure S3.** Minimum biofilm inhibitory concentration (MBIC) of GATR-3 against (A) *P. aeruginosa* BAA-2110, (B) *K. pneumoniae*, (C) *E. asburiae* BAA-3043, and (D) *E. faecalis* 51299. Crystal violet stain was read via OD<sub>590</sub>.

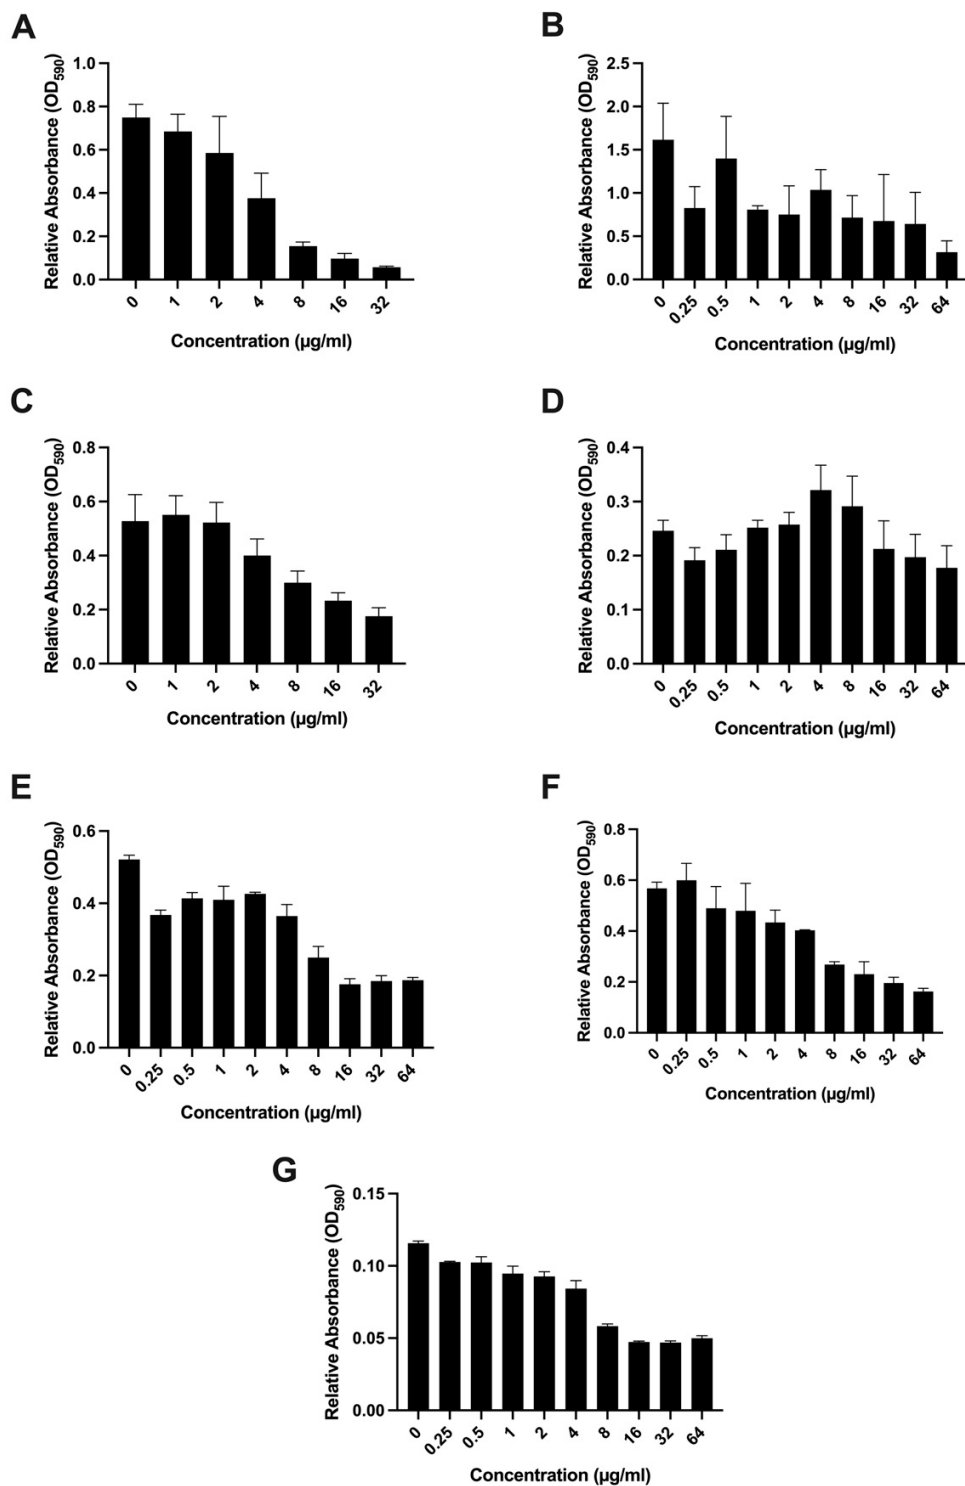

**Figure S4.** Crystal violet staining of minimum biofilm eradication concentration (MBEC) assay. GATR-3 was challenged with *A. baumannii*: (A) AB5075, (B) BAA-1710, (C) BAA-1794, (D) BAA-1795, (E) BAA-1797, (F) BAA-1605 and (G) BAA-1800. Crystal violet stain was read via OD<sub>590</sub>.

**Table S2.** Sequences of peptides mentioned in this study.

| Peptide   | Sequence                             | Reference |
|-----------|--------------------------------------|-----------|
| HRZN-15   | FLPWISKFLGKIL                        | [39]      |
| SAAP-148  | LKRVWKRVPFKLLKRYWRQLKKPVR            | [54]      |
| LL-37     | LLGDFFRKSKEKIGKEFKRIVQRIKDFLRNLPRTES | [105]     |
| Pexiganan | GIGKFLKKAKKFGKAFVKILKK               | [106]     |

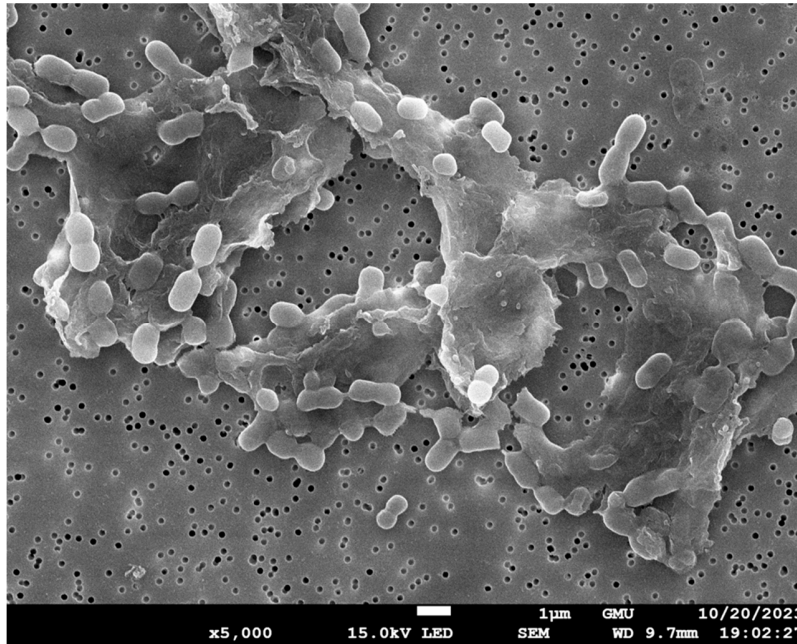

**Figure S5.** Sub-biofilm eradication concentration of GATR-3. Scanning electron micrograph of *A. baumannii* AB5075 treated with 16 µg/ml GATR-3 (in the treatment well). The image is taken at 5,000x with a working distance of 9.7 mm. The white bar represents 1 µm.

**Table S3.** Log of mean and standard deviation of MBEC assay.

| GATR-3                 |       |       | Polymyxin B            |       |       |
|------------------------|-------|-------|------------------------|-------|-------|
| Concentration<br>µg/ml | Mean  | SD    | Concentration<br>µg/ml | Mean  | SD    |
| 0                      | 8.253 | 0.048 | 0                      | 8.516 | 0.174 |
| 2                      | 7.637 | 0.012 | 0.25                   | 7.662 | 0.093 |
| 4                      | 7.563 | 0.036 | 0.5                    | 7.801 | 0.089 |
| 8                      | 7.263 | 0.219 | 1                      | 7.354 | 0.154 |
| 16                     | 6.249 | 0.228 | 2                      | 0     | 0     |
| 32                     | 0     | 0     | 4                      | 0     | 0     |
| 64                     | 0     | 0     | 8                      | 0     | 0     |
| -                      | -     | -     | 16                     | 0     | 0     |

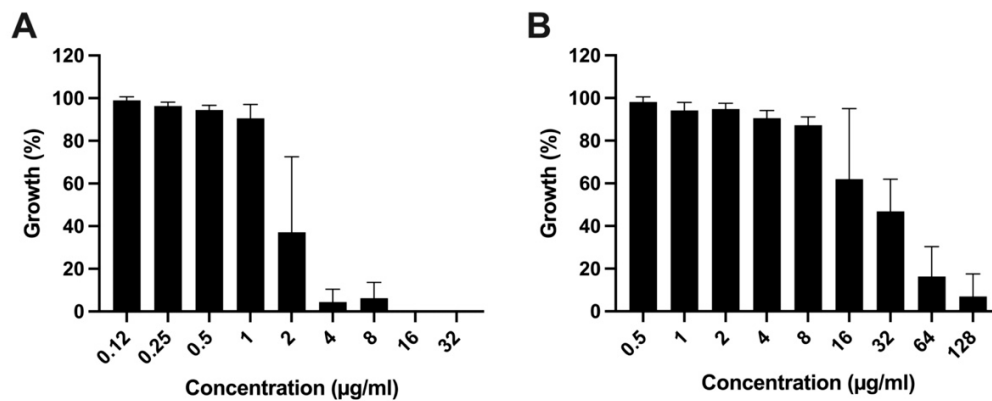

**Figure S6.** Evaluation of cross-resistance development of (A) GATR-3 against colistin-exposed *A. baumannii* from the 60<sup>th</sup> passage by minimum inhibitory concentration (MIC) assay. (B) Colistin was tested to show that the bacteria are resistant to colistin.

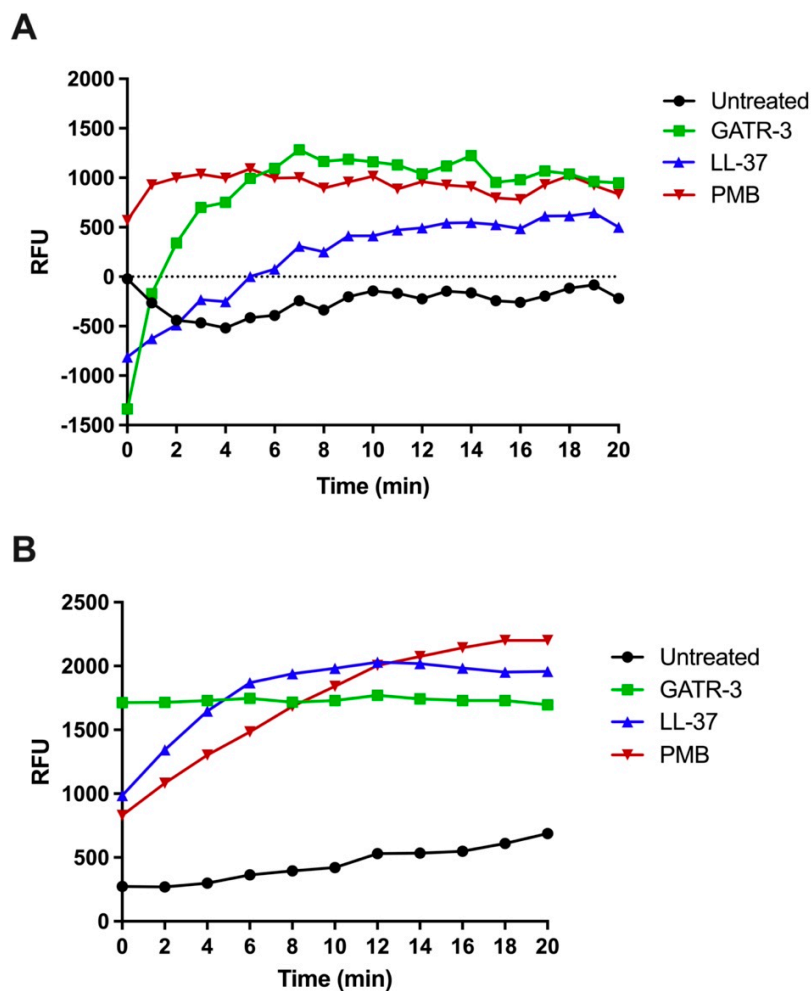

**Figure S7.** Kinetics of membrane depolarization (A) and disruption (B) of GATR-3, LL-37 and polymyxin B (PMB) against AB5075 by the fluorescent dye DiSC<sub>3</sub>(5) and ethidium bromide. Bacteria were incubated with 50 μg/ml peptide/drug, and the results were obtained after 20 minutes of challenge exposure.

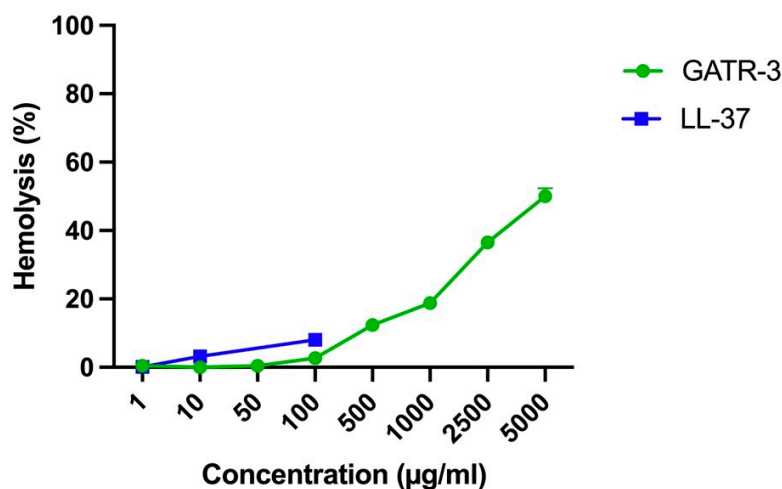

**Figure S8:** Hemolytic activity of GATR-3 and LL-37 against human red blood cells. A 2% RBC suspension was incubated with 5000, 2500, 1000, 500, 100, 50, 10, and 1 µg/ml GATR-3 and 100, 10, and 1 µg/ml LL-37. The release of hemoglobin (n = 3) was measured at OD<sub>540</sub>, and the percentage of hemolysis was calculated relative to the Triton X-100-treated RBCs (100% hemolysis).

**Figure S9:** GATR-3 peptide quality control information. Purity, liquid chromatography (HPLC) and mass-spectrometry (ESI-MS) analysis of GATR-3 peptides used in this study from manufacturer.

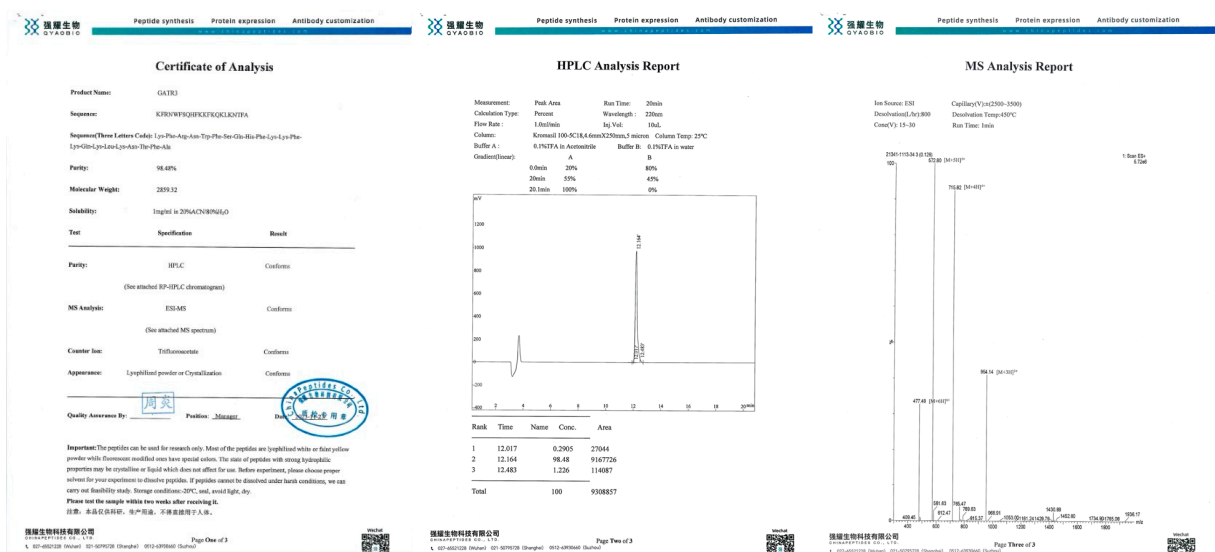

**Figure S10:** LL-37 peptide quality control information. Purity, liquid chromatography (HPLC) and mass-spectrometry (ESI-MS) analysis of LL-37 peptides used in this study from the manufacturers.



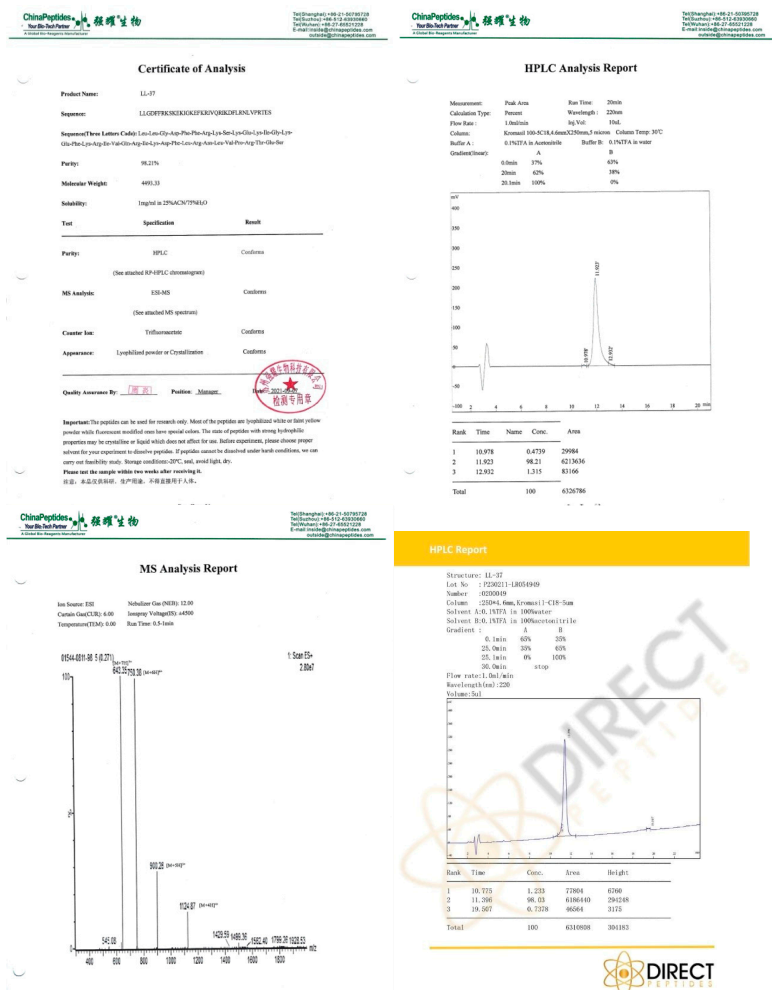

Supplement: s1 [file s1]
